# Supplementary material for: Mitochondrial Porin Is Involved in Development, Virulence, and Autophagy in Fusarium graminearum
Source: MDPI journal article supplement (doi:10.3390/jof8090936), 2022-09-04
Supplement: s1 [file s1]

## Supplementary Materials:

**Table S1** Primers used in this study.

| Primer     | Sequence (5'-3')                                            | Application                                                 |
|------------|-------------------------------------------------------------|-------------------------------------------------------------|
| porin-AF   | AGTGCGAGTGTCCGGTGAATG                                       | amplify <i>Fgporin</i> 5' flank sequence                    |
| porin-AR   | TTGACCTCCACTAGCTCCAGCCAAGCC<br>GGACGGGAGAGAGAAACGG          |                                                             |
| porin-BF   | GAATAGAGTAGATGCCGACCGCGGGTT<br>TCCC GTTGATGTGTTCCG          | amplify <i>Fgporin</i> 3' flank sequence                    |
| porin-BR   | CCTGGATGATTGGGTGCTT                                         | amplify <i>Hph</i> N-terminal sequence                      |
| HYG-F      | GGCTTGGCTGGAGCTAGTGGAGGTCAA                                 |                                                             |
| HY-R       | AACCCGCGGTCCGCATCTACTCTATTC                                 | amplify <i>Hph</i> C-terminal sequence                      |
| YG-F       | GATGTAGGAGGGCGTGGATATGTCCT                                  |                                                             |
| HYG-R      | GTATTGACCGATTCTTGC GGTC CGAA                                | for identification of <i>Fgporin</i> deletion transformants |
| porin-K1F  | GAGGGTGTGAGGTTGTGCTC                                        |                                                             |
| porin-K1R  | GTTGGCGACCTCGTATTGG                                         | for identification of <i>Fgporin</i> deletion transformants |
| porin-K2F  | GCGAAGAATCTCGTGCTTTC                                        |                                                             |
| porin-K2R  | CGCCGCTCTTACTACGCT                                          | for identification of <i>Fgporin</i> deletion transformants |
| porin-MF   | AGATACCAAACACCGCAATCA                                       |                                                             |
| porin-MR   | CTTCACGGACATAAAGAGGCA                                       | quantitative RT-PCR analysis                                |
| GAPDH-F    | CTTACTGCCTCCACCAACTG                                        | quantitative RT-PCR analysis                                |
| GAPDH-R    | TGACGTTGGAAGGAGCGAAG                                        |                                                             |
| Tri5-F     | GAGTGTTTCATGCATGGCTACGTC                                    | quantitative RT-PCR analysis                                |
| Tri5-R     | CTGAGCCTCCTTCACATCGTCC                                      |                                                             |
| Tri6-F     | CTGAGGGCATTCTGAGTAGCGACA                                    | quantitative RT-PCR analysis                                |
| Tri6-R     | CGTTATGTTTATCGGCACTTTC                                      |                                                             |
| Tri10-F    | GCGACAGGAGCAAGAACATAA                                       | quantitative RT-PCR analysis                                |
| Tri10-R    | GGCGGCGTAAATCTGAGTG                                         |                                                             |
| porin-CF   | CACCATCACCATCACTCGAGCAGTTCTC<br>TGATGGTGTCGG                | <i>Fgporin</i> complementation                              |
| porin-CR   | CGCCCTTGCTCACCTCGAGTGAAAGCA<br>TGAAGGCAACCT                 |                                                             |
| Tri1-GFP-F | TCGTGGTTCTCATCACCATCACCATCAC<br>TCGAGGAAAGAGGCTGGTAGCTGCG   | For <i>FgTri1-GFP</i> fusion construct generation           |
| Tri1-GFP-R | CCGGTGAACAGCTCCTCGCCCTTGCTCA<br>CGTCATCCTGTACCAATTCCAATCGC  |                                                             |
| Tri4-GFP-F | TCGTGGTTCTCATCACCATCACCATCAC<br>TCGAGAGTAGCGACAGAAAAAGCGCTT | For <i>FgTri4-GFP</i> fusion construct generation           |

|                           |                                                                     |                                            |
|---------------------------|---------------------------------------------------------------------|--------------------------------------------|
|                           | G                                                                   |                                            |
| Tri4-GFP-R                | CCGGTGAACAGCTCCTCGCCCTTGCTCA<br>CCAAAGCCTTGAGAACCTTGACTCG           |                                            |
| GFP-Atg8-1F               | CGACTCACTATAGGGCGAATTGGGTAC<br>TCAAATTGGGAACAACCTGAGAACTCGG<br>GTGA | amplify <i>GFP-FgAtg8</i><br>sequence      |
| GFP-Atg8-1R               | GGTGAACAGCTCCTCGCCCTTGCTCACC<br>ATGTTGACGGTGATGGTTGTTG              |                                            |
| GFP-Atg8-2F               | GGTGAACAGCTCCTCGCCCTTGCTCACC<br>ATGTTGACGGTGATGGTTGTTG              | amplify <i>GFP-FgAtg8</i><br>sequence      |
| GFP-Atg8-2R               | ACCATCACCGTCAACATGGTGAGCAAG<br>GGCGAGGAGCTGTT                       |                                            |
| GFP-Atg8-3F               | CCTTGAATTTGCTGCGCTGTACAGCTC<br>GTCCATGCCGAGAG                       | amplify <i>GFP-FgAtg8</i><br>sequence      |
| GFP-Atg8-3R               | CTCGGCATGGACGAGCTGTACAAGCGC<br>AGCAAATTCAAGGACGA                    |                                            |
| AD-porin-F                | AGATTACGCTCATATGGCCATGGAGGC<br>CAGTGAATTCATGTCTGTCCCCGCCTTC<br>T    | amplify pGADT7- <i>Fgporin</i><br>sequence |
| AD-porin-R                | GATGGATCCCGTATCGATGCCCACCCG<br>GGTGGAATTCTTAACCCTCGAAGGTGA<br>AGC   |                                            |
| AD-Mdm35-F                | TACGCTCATATGGCCATGGAGGCCAGT<br>GAATTCATGTCAGCTTCACTATCACC           | amplify pGADT7- <i>FgMdm35</i><br>sequence |
| AD-Mdm35-R                | CGCTGCAGGTCGACGGATCCCCGGGAA<br>TTCCTACTCACGGGCCTCTTGACCAG           |                                            |
| AD-Ups1-F                 | AGATTACGCTCATATGGCCATGGAGGC<br>CAGTGAATTCATGGTTCTCACTCGCACG<br>A    | amplify pGADT7- <i>FgUps1</i><br>sequence  |
| AD-Ups1-R                 | ATGGATCCCGTATCGATGCCCACCCGG<br>GTGGAATTCTTAAGCAAGTTGACGCTG<br>ACG   |                                            |
| AD-Ups2-F                 | TACGCTCATATGGCCATGGAGGCCAGT<br>GAATTCATGAAGGTCTTTAGCAACAGC<br>G     | amplify pGADT7- <i>FgUps2</i><br>sequence  |
| AD-Ups2-R                 | ATGGATCCCGTATCGATGCCCACCCGG<br>GTGGAATTCTTATAGAACCTGGCGAGC<br>CCT   |                                            |
| BD-porin-F                | TCAGAGGAGGACCTGCATATGGCCATG<br>GAGGCCGAATTCATGTCTGTCCCCGCCT<br>TC   | amplify pGBKT7- <i>Fgporin</i><br>sequence |
| BD-porin-R                | CCGCTGCAGGTCGACGGATCCCCGGGA<br>ATTCTTAACCCTCGAAGGTGAAGCTG           |                                            |
| porin-YFP <sup>N</sup> -F | TGGTTCTCATCACCATCACCATCACTCG                                        | amplify <i>Fgporin-YFP<sup>N</sup></i>     |

|                            |                              |                                        |
|----------------------------|------------------------------|----------------------------------------|
|                            | AGACTGGTACCGATGCATGTTT       | sequence                               |
| porin-YFP <sup>N</sup> - R | GCCCTTGCTCACCATCGTGGCGATGGA  |                                        |
|                            | GCGACCCTCGAAGGTGAAGCTGG      |                                        |
| Ups1-YFP <sup>N</sup> - F  | TGGTTCTCATCACCATCACCATCACTCG | amplify <i>FgUps1-YFP<sup>N</sup></i>  |
|                            | AGAGTGTGTGCATTACACATC        | sequence                               |
| Ups1-YFP <sup>N</sup> - R  | GCCCTTGCTCACCATCGTGGCGATGGA  |                                        |
|                            | GCGAGCAAGTTGACGCTGACGTT      |                                        |
| Ups2-YFP <sup>N</sup> - F  | TGGTTCTCATCACCATCACCATCACTCG | amplify <i>FgUps2-YFP<sup>N</sup></i>  |
|                            | AGGTATCCGCAACCTCACAGGA       | sequence                               |
| Ups2-YFP <sup>N</sup> - R  | GCCCTTGCTCACCATCGTGGCGATGGA  |                                        |
|                            | GCGTAGAACCTGGCGAGCCCTCT      |                                        |
| porin-YFP <sup>C</sup> - F | TGGTTCTCATCACCATCACCATCACTCG | amplify <i>Fgporin-YFP<sup>C</sup></i> |
|                            | AGACTGGTACCGATGCATGTTT       | sequence                               |
| porin-YFP <sup>C</sup> - R | CAGGTCGTTTCGGGATCTTGCAGGCCGG |                                        |
|                            | GCGACCCTCGAAGGTGAAGCTGG      |                                        |

**Table S2** The amino acid similarity of Fgporin with other fungal porins.

|                       | <i>Fusarium</i><br><i>graminearum</i> porin | <i>Fusarium</i><br><i>oxysporum</i> porin | <i>Neurospora</i><br><i>crassa</i> porin | <i>Saccharomyces</i><br><i>cerevisiae</i> porin1 | <i>Saccharomyces</i><br><i>cerevisiae</i> porin2 |
|-----------------------|---------------------------------------------|-------------------------------------------|------------------------------------------|--------------------------------------------------|--------------------------------------------------|
| Number of Amino acids | 283                                         | 283                                       | 283                                      | 283                                              | 281                                              |
| Similarity            |                                             | 100%                                      | 82%                                      | 43%                                              | 33%                                              |

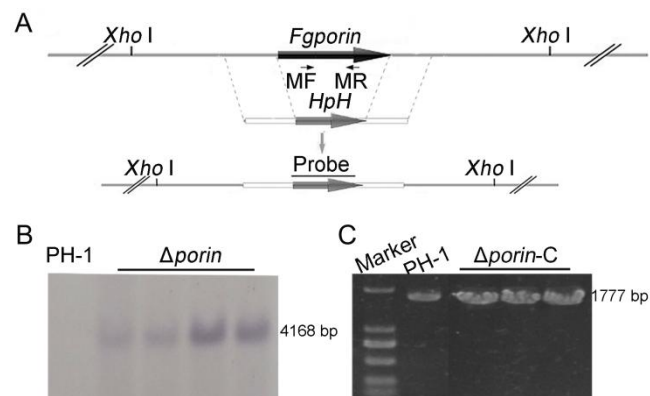

**Figure S1** Generation and identification of *Fgporin* deletion mutants. (A) Deletion strategy used for *Fgporin*. The gene replacement cassette contained the whole *hygromycin-phosphotransferase* (*HpH*) gene. (B) Southern blot analysis of *Fgporin* deletion mutants. Genomic DNA was digested with *Xho* I. (C) PCR verification of *Fgporin* complementation strains.

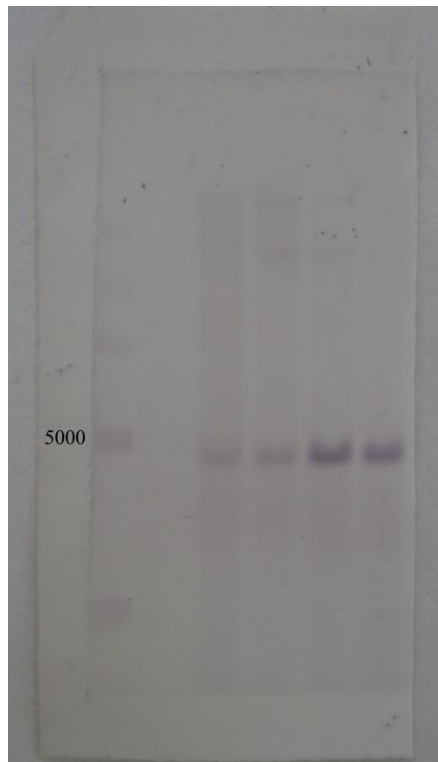

**Figure S2** Southern blot analysis of *Fgporin* deletion mutants. Genomic DNA was digested with *Xho* I.

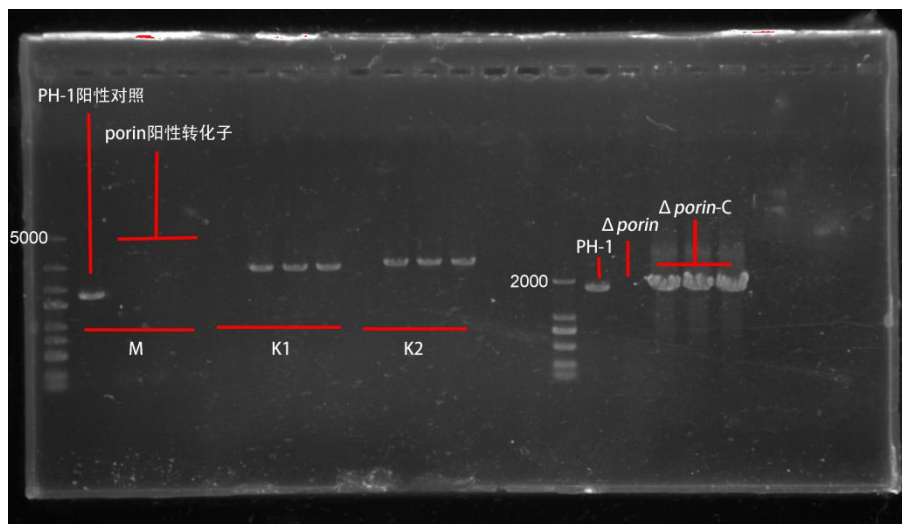

**Figure S3** PCR verification of *Fgporin* deletion mutants and *Fgporin* complementation strains.

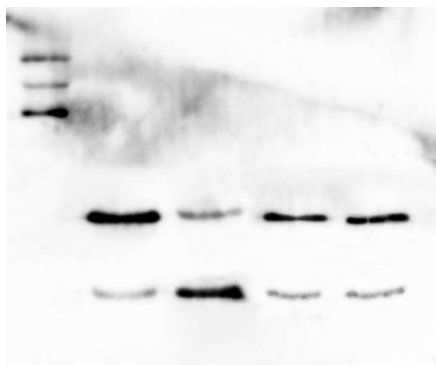

Figure S4 The original picture of Western Blot. The upper band was GFP-FgAtg8, and the lower band was GFP.

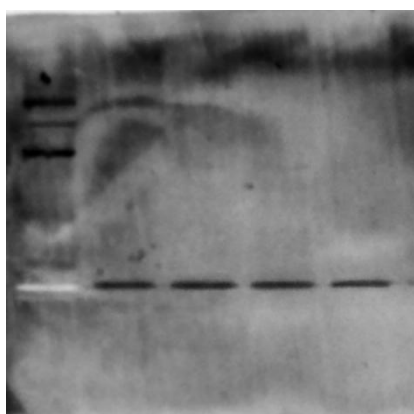

Figure S5 The original picture of Western Blot. The band was GAPDH.
